# Supplementary material
Source: publisher figshare collection journal article supplement (https://acs.figshare.com/ndownloader/files/4762453)
Supplement: Supplementary file 1 [file 4762453]

# Supporting Information

## for

### Dynamic kinetic resolution of benzoin s by enzyme-metal combo catalysis.

Pilar Hoyos, María Fernández, José V. Sinisterra, Andrés R. Alcántara

*Grupo de Biotransformaciones. Dpto. Química Orgánica y Farmacéutica. Fac.*

*Farmacia. Universidad Complutense. Madrid (Spain).*

#### Table of contents

|                                                                                                                                               |         |
|-----------------------------------------------------------------------------------------------------------------------------------------------|---------|
| 1. Materials.....                                                                                                                             | S-1     |
| 2. Analytical methods.....                                                                                                                    | S-2     |
| 3. Synthesis of <b>R,S-1d</b> and <b>R,S-1e</b> .....                                                                                         | S-3-5   |
| 4. Synthesis of <b>R,S-2b</b> , <b>R,S-2d</b> , <b>R,S-2g</b> , <b>R,S-2h</b> , <b>R,S-2i</b> , <b>R,S-2j</b> .....                           | S-5-12  |
| 5. Synthesis of <b>R,S-2a</b> and <b>R,S-2c</b> .....                                                                                         | S-12-14 |
| 6. General methods for transesterification (Kinetic resolution).....                                                                          | S-14-19 |
| 7. General procedure for Dynamic Kinetic Resolution.....                                                                                      | S-19    |
| 8. NMR spectra for <b>R,S-2b</b> , <b>R,S-2d</b> , <b>R,S-2g</b> , <b>R,S-2h</b> , <b>R,S-2i</b> , <b>R,S-2j</b> ,<br>and <b>R,S-2c</b> ..... | S-19-34 |

#### 1. Materials

Lipase TL® from *Pseudomonas stutzeri* was a generous gift from Meito & Sangyo Co, Ltd®. Shvo's catalyst (1-Hydroxytetraphenylcyclopentadienyl(tetraphenyl-2,4-cyclopentadien-1-one)-μ-hydrotracarbonyl diruthenium (II), 98%) was obtained from Strem Chemicals Inc. (Newburyport, MA, USA).

## **2. Analytical methods**

HPLC analysis were performed with a chiral column Chiracel OD (cellulose carbamate, 25 cm x 0.46 cm i. d) at room temperature, using HPLC (mobile phase of n-hexane/ 2-propanol, 90/10 at a flow rate of 0.8 mL/min).

NMR spectra were recorded on a Bruker AC-250. Chemical shifts ( $\delta$ ) are reported in parts per million (ppm) relative to  $\text{CHCl}_3$  ( $^1\text{H}$ :  $\delta$  7.27 ppm) and  $\text{CDCl}_3$  ( $^{13}\text{C}$ :  $\delta$  77.0 ppm).

Column chromatography purifications were conducted on silica gel 60 (40-63  $\mu\text{m}$ ). TLC was carried out on aluminium sheets precoated with silica gel; the spots were visualized under UV light ( $\lambda=254$  nm).

### 3. Synthesis of 2,2'-Thenoin (*R,S*-1d) and 3,3'-Thenoin (*R,S*-1e)

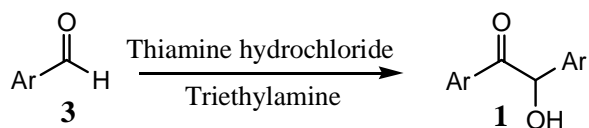

| 3                             | Ar                 | 1             |
|-------------------------------|--------------------|---------------|
| 3a: 2-Thiophenecarboxaldehyde | Ar = 2-Thienyl-    | 1d: 2-Thenoin |
| 3b: Thiophenecarboxaldehyde   | 3- Ar = 3-Thienyl- | 1e: 3-Thenoin |

#### 3. 1. Synthesis of 2-thenoin [2-hydroxy-1,2-di(thiophen-2-yl)ethanone], (*R,S*)-1d.

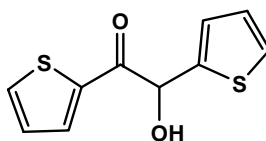

Thiamine hydrochloride (1.686 g, 5 mmol) was dissolved in absolute ethanol (30 mL) in a round bottom flask and triethylamine (4.2 mL, 30mmol) and 2-thiophenecarboxaldehyde were added (8.9 mL, 100mmol). The mixture was stirred at room temperature, under argon atmosphere. The solution presented a dark green color, turning to red in 15 minutes. The reaction progress was followed by TLC (n-hexane/ 2-propanol, 7/2 (v/v); **3a**,  $R_f = 0.25$ ; **1d**,  $R_f = 0.09$ ). After 24 hours the product started to precipitate. The mixture was filtered and the white solid collected (10.75 g, 48 mmol) was washed with cold ethanol (48% yield).

**$^1\text{H}$  NMR** (250 MHz,  $\text{CDCl}_3$ )  $\delta$  (ppm): 7.79 (1H, dd,  $J=3.8$  Hz,  $J=1.0$  Hz), 7.75 (1H, dd,  $J=4.9$  Hz,  $J=1.1$  Hz), 7.34 (1H, dd,  $J=5.9$  Hz,  $J=1.1$  Hz), 7.15 (1H, dd,  $J=4.9$  Hz), 7.13 (1H, dddd,  $J=3.5$  Hz,  $J=1.2$  Hz,  $J=0.6$ Hz), 7.01 (1H, dd,  $J=5.1$  Hz,  $J=3.5$  Hz), 6.07 (1H, s), 4.41 (1H, 2d,  $J=1.4$  Hz,  $J=0.8$  Hz).  **$^{13}\text{C}$  NMR** (63 MHz,  $\text{CDCl}_3$ )  $\delta$  (ppm): 190.3,

142.4, 139.6, 135.8, 134. , 128.8, 127.6 , 127.3, 127.2, 71.3. Anal. Calcd. for  $C_{10}H_8O_2S_2$ : C, 53.53; H, 3.59; S, 28.59. Found: C, 53.58; H, 3.62; S, 28.56.

HPLC analysis (n-hexane/2-propanol, 90/10; Flow 0.8 mL/min): retention time

(*R*)-**1d**= 11.17 min, (*S*)-**1d**= 10.17 min.

| file - \lctalk\integrat\17ENE260.014 |        |         |       |       |          |        |
|--------------------------------------|--------|---------|-------|-------|----------|--------|
| Retention                            | Height | Area    | Start | End   | % Height | % Area |
| 5.83                                 | 89974  | 173177  | 5.18  | 6.17  | 4.931    | 2.21   |
| 6.42                                 | 39734  | 110346  | 6.18  | 7.42  | 2.178    | 1.41   |
| 10.17                                | 853073 | 3038786 | 9.01  | 10.58 | 46.752   | 39.21  |
| 11.17                                | 841913 | 4422537 | 10.59 | 14.50 | 46.139   | 57.11  |

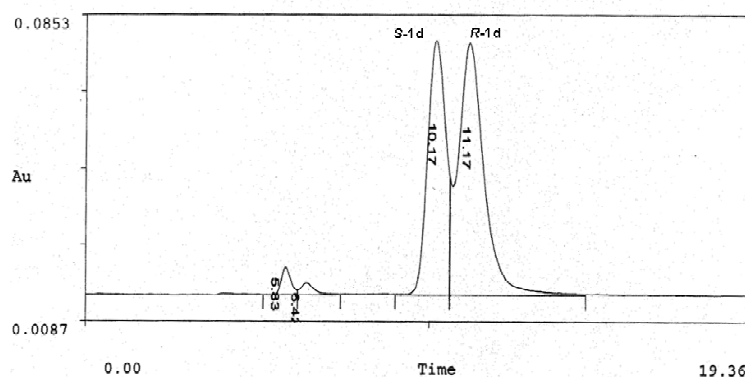

### 3. 2. Synthesis of 3-thenoin [(2-hydroxy-1,2-di(thiophen-3-yl)ethanone) (*R,S*)-

**1e**.

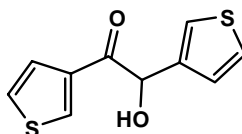

3-thenoin was synthesized by the same method as for 2-thenoin, using 3-thiophenecarboxaldehyde (**3b**) as substrate. The evolution of the reaction was followed by TLC (n-hexane/2-propanol, 7/2 (v/v); **3b**,  $R_f = 0.45$ ; **1e**  $R_f = 0.25$ ). The reaction time was 24 hours, and 9.18 g of **1e** (41 mmol) were collected (41% yield).

$^1\text{H NMR}$  (250 MHz,  $\text{CDCl}_3$ )  $\delta$ : 4.34 (1H, d,  $J = 6.0$  Hz), 5.84 (1H, d,  $J = 6.0$  Hz), 6.99 (1H, dd,  $J = 4.9$  Hz,  $J = 1.2$  Hz), 7.28 (1H, d,  $J = 2.8$  Hz), 7.3 (1H, dd,  $J = 2.9$  Hz,  $J = 0.7$  Hz), 7.33 (1H, dd,  $J = 2.7$  Hz,  $J = 1.1$  Hz), 7.51 (1H, dd,  $J = 5.3$  Hz,  $J = 1.1$  Hz), 8.04 (1H,

dd,  $J = 2.8$  Hz,  $J = 1.2$  Hz).  $^{13}\text{C}$  RMN (63 MHz,  $\text{CDCl}_3$ )  $\delta$ : 72.4, 124.2, 124.2, 126.5, 127.0, 127.2, 134.2, 192.3. Anal. Calcd. for  $\text{C}_{10}\text{H}_8\text{O}_2\text{S}_2$ : C, 53.55; H, 3.59; S, 28.59. Found: C, 53.52; H, 3.92; S, 27.36.

HPLC analysis (n-hexane/2-propanol, 90/10; Flow 0.8 mL/min): retention time **(R)-1e** = 12.64 min, **(S)-1e** = 10.72 min.

File - \lctalk\integrat\17ENE250.012

| Retention | Height  | Area     | Start | End   | % Height | % Area |
|-----------|---------|----------|-------|-------|----------|--------|
| 10.72     | 2662420 | 11987064 | 9.76  | 11.89 | 52.632   | 48.61  |
| 12.64     | 2396114 | 12669785 | 11.90 | 15.60 | 47.368   | 51.39  |

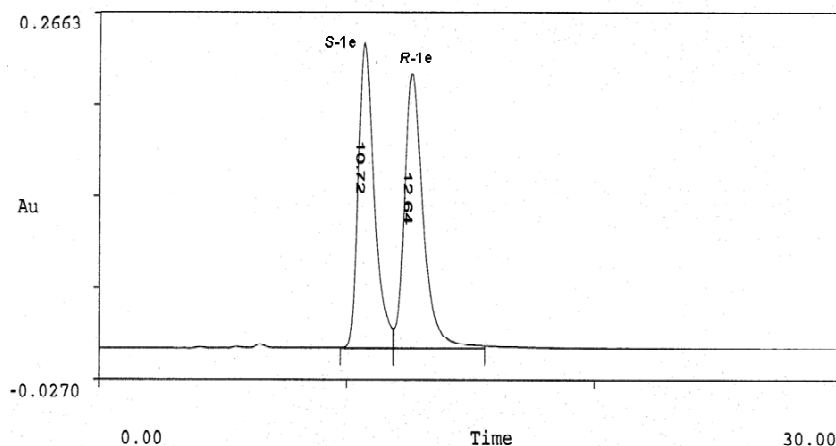

**4. Synthesis of butyric esters of benzoin: 2-oxo-1,2-diphenylethyl butyrate (R,S-2b), 1,2-di(furan-2-yl)-2-oxoethyl butyrate (R,S-2d), 2-oxo-1,2-di(thiophen-2-yl)ethyl butyrate (R,S-2g), 2-oxo-1,2-di(thiophen-3-yl)ethyl butyrate (R,S-2h), 1,2-bis(4-methoxyphenyl)-2-oxoethyl butyrate (R,S-2i), 1,2-bis(4-ethoxyphenyl)-2-oxoethyl butyrate (R,S-2j):**

General procedure:

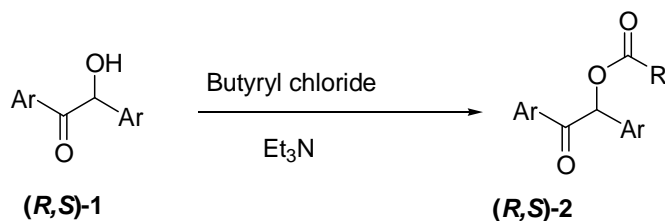

**1** was dissolved in dichloromethane and triethylamine (1.1 equiv.) and butyryl chloride (1.5 equiv.) were added. The mixture was stirred at room temperature. After 15 hours the product was purified by silica-gel column chromatography (n-hexane/ethyl acetate 5/1 (v/v))

**4. 1: 2-oxo-1,2-diphenylethyl butyrate (*R,S*-2b) (44% yield)**

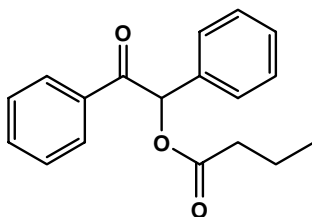

**<sup>1</sup>H NMR** (250 MHz, CDCl<sub>3</sub>): 7.97 (2H, dd, *J*=8.3, *J*=2.0 Hz), 7.96 (2H, dd, *J*=8.3, *J*=1.5 Hz), 7.57 (1H, t, *J*=1.3 Hz), 7.54 (1H, t, *J*=2.4 Hz), 7.51 (1H, m), 7.48 (1H, d, *J*=1.9 Hz), 7.45 (1H, dd, *J*=1.4, *J*=2.0 Hz), 7.42 (1H, m), 7.39 (1H, dd, *J*=1.9, *J*=2.0 Hz), 7.37 (1H, d, *J*=1.9 Hz), 6.89 (1H, s), 2.54 (1H, c, *J*=7.6 Hz), 2.42 (1H, c, *J*=7.6 Hz), 1.74 (2H, sex, *J*=7.4 Hz), 1.0 (3H, t, *J*=7.4 Hz). **<sup>13</sup>C NMR** (63 MHz, CDCl<sub>3</sub>) δ (ppm): 194.37, 173.62, 135.10, 134.10, 133.86, 129.67, 129.51, 129.51, 112.80, 76.92, 36.27, 18.80, 14.03. Anal. Calcd. for C<sub>18</sub>H<sub>18</sub>O<sub>3</sub>: C, 76.59; H, 6.43. Found: C, 75.44; H, 6.23.

HPLC analysis (n-hexane/2-propanol, 90/10; Flow 0.8 mL/min): retention time (***R*)-2b**= 5.04 min, (***S*)-2b**= 5.55 min.

File - \lotalk\integrat\16ENE243.013

| Retention | Height  | Area    | Start | End  | % Height | % Area |
|-----------|---------|---------|-------|------|----------|--------|
| 5.04      | 3944607 | 6314216 | 4.64  | 5.31 | 52.940   | 48.89  |
| 5.55      | 3506420 | 6598577 | 5.32  | 6.34 | 47.060   | 51.11  |

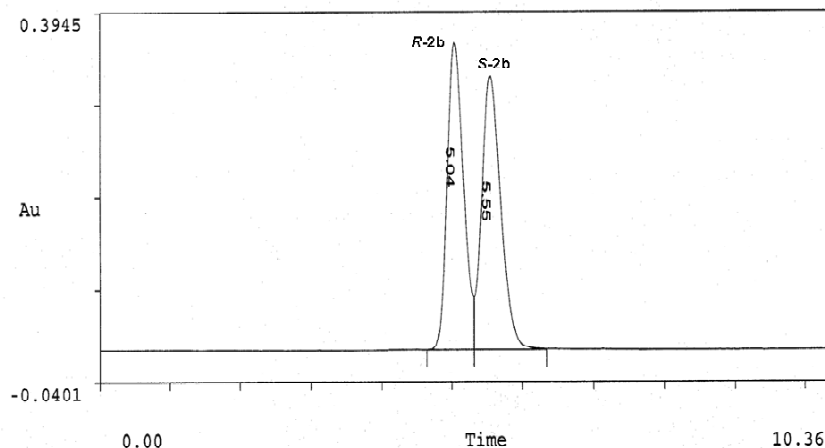

**4. 2: 1,2-di(furan-2-yl)-2-oxoethyl butyrate (*R,S*-2d) (67% yield)**

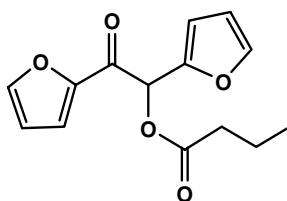

$^1\text{H NMR}$  (250 MHz,  $\text{CDCl}_3$ ): 7.50 (1H, dd,  $J=1.7$  Hz,  $J=0.7$  Hz), 7.38 (1H, dd,  $J=1.8$  Hz,  $J=0.8$  Hz), 7.20 (1H, dd,  $J=3.5$  Hz,  $J=0.7$  Hz), 6.9 (1H, s), 6.45 (1H, dd,  $J=3.6$  Hz,  $J=1.7$  Hz), 6.43 (1H, dd,  $J=3.3$ ,  $J=0.4$  Hz), 2.39 (1H, t,  $J=7.4$  Hz), 2.37 (1H, t,  $J=7.5$  Hz), 1.73 (2H, sex,  $J=7.4$  Hz), 0.99 (3H, t,  $J=7.4$  Hz).  $^{13}\text{C NMR}$  (63 MHz,  $\text{CDCl}_3$ )  $\delta$  (ppm): 178.8, 171.8, 149.2, 146.1, 145.5, 143.1, 118.1, 111.4, 110.6, 110.0, 69.1, 34.5, 17.3, 12.5. Anal. Calcd. for  $\text{C}_{14}\text{H}_{14}\text{O}_5$ : C, 64.12; H, 5.38. Found: C, 62.83; H, 5.29.

HPLC analysis (n-hexane/2-propanol, 90/10; Flow 0.8 mL/min): retention time: (*R,S*)-2d= 6.43 min.

File - \\lotalk\\integrat\\17ENE273.013

| Retention | Height  | Area    | Start | End  | % Height | % Area  |
|-----------|---------|---------|-------|------|----------|---------|
| 6.43      | 3569440 | 7945524 | 5.93  | 7.42 | 100.000  | 100.000 |

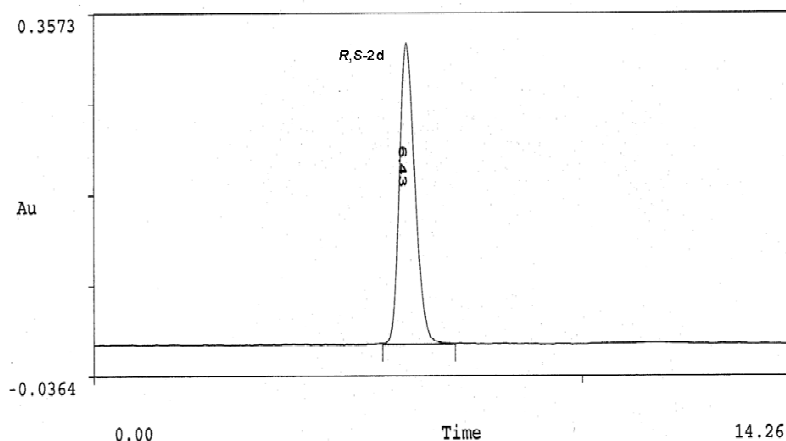

**4. 3: 2-oxo-1,2-di(thiophen-2-yl)ethyl butyrate (*R,S*-2g) (86% yield).**

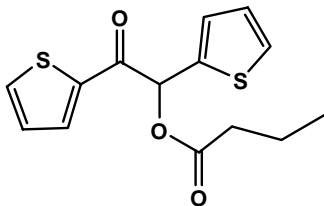

**<sup>1</sup>H NMR** (250 MHz, CDCl<sub>3</sub>): 7.84 (1H, dd, *J*=3.8 Hz, *J*=1.0 Hz), 7.70 (1H, dd, *J*=4.9 Hz, *J*=1.1 Hz), 7.4 (1H, dd, *J*=5.1 Hz, *J*=1.2 Hz), 7.40 (1H, dd, *J*=5.1 Hz, *J*=1.2 Hz), 7.21 (1H, ddd, *J*=3.6, *J*=1.1, *J*=0.5, Hz), 7.13 (1H, dd, *J*=4.93 Hz, *J*=3.9 Hz), 7.03 (1H, dd, *J*=5.2 Hz, *J*=3.5 Hz), 6.9 (1H, s), 2.49 (1H, t, *J*=7.7 Hz), 2.47 (1H, t, *J*=7.3 Hz), 1.73 (2H, sex, *J*=7.4 Hz), 0.99 (3H, t, *J*=7.4 Hz). **<sup>13</sup>C NMR** (63 MHz, CDCl<sub>3</sub>) δ (ppm): 185.9, 173.3, 140.7, 135.9, 135.2, 133.8, 129.2, 128.7, 128.4, 127.7, 73.2, 36.2, 18.7, 14.0. Anal. Calcd. for C<sub>14</sub>H<sub>14</sub>O<sub>3</sub>S<sub>2</sub>: C, 57.12; H, 4.79; S, 21.78. Found: C, 56.26; H, 4.64; S, 21.30.

HPLC analysis (n-hexane/2-propanol, 90/10; Flow 0.8 mL/min): retention time:

**(*R*)-2g**= 6 min, **(*S*)-2g**= 6.64 min.



File - \lctalk\integrat\3JUN249.011

| Retention | Height  | Area    | Start | End  | % Height | % Area |
|-----------|---------|---------|-------|------|----------|--------|
| 6.00      | 1739521 | 3327790 | 5.69  | 6.33 | 52.407   | 48.51  |
| 6.64      | 1579715 | 3521815 | 6.34  | 7.71 | 47.593   | 51.49  |

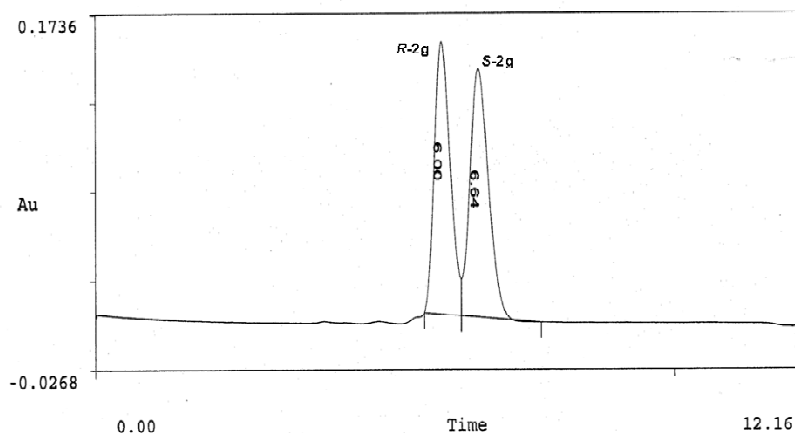

**4. 4: 2-oxo-1,2-di(thiophen-3-yl)ethyl butyrate (*R,S*-2h) (89% yield)**

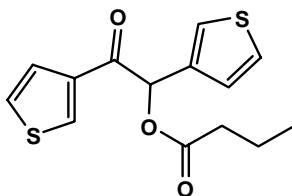

<sup>1</sup>H NMR (250 MHz, CDCl<sub>3</sub>): 8.02 (1H, dd, *J*=2.9 Hz, *J*=1.3 Hz), 7.45 (1H, dd, *J*=5.1 Hz, *J*=1.3 Hz), 7.35 (1H, ddd, *J*=2.9 Hz, *J*=1.3 Hz, *J*=0.5 Hz), 7.25 (1H, dd, *J*=5 Hz, *J*=4 Hz), 7.21 (1H, dd, *J*=5, *J*=2.9 Hz), 7.06 (1H, dd, *J*=5 Hz, *J*=1.3 Hz), 6.9 (1H, s), 2.37 (1H, t, *J*=7.5 Hz), 2.36 (1H, t, *J*=7.3 Hz), 1.62 (2H, sex, *J*=7.4 Hz), 0.89 (3H, t, *J*=7.4 Hz). <sup>13</sup>C NMR (63 MHz, CDCl<sub>3</sub>) δ (ppm): 188.1, 173.4, 139.2, 134.8, 133.7, 127.7, 127.4, 127.3, 126.8, 126.0, 74.3, 36.2, 18.8, 14.0. Anal. Calcd. for C<sub>14</sub>H<sub>14</sub>O<sub>3</sub>S<sub>2</sub>: C, 57.12; H, 4.79; S, 21.78. Found: C, 56.09; H, 4.69; S, 21.43.

HPLC analysis (n-hexane/2-propanol, 90/10; Flow 0.8 mL/min): retention time: (*R*)-2h= 5.92 min, (*S*)-2h= 6.50 min.

File - \\lctalk\\integrat\\5JUL4247.013

| Retention | Height  | Area    | Start | End   | % Height | % Area |
|-----------|---------|---------|-------|-------|----------|--------|
| 5.92      | 3095434 | 5936883 | 4.25  | 6.17  | 52.494   | 46.81  |
| 6.50      | 2719124 | 6412933 | 6.18  | 8.17  | 46.112   | 50.56  |
| 9.42      | 72473   | 238797  | 8.18  | 10.67 | 1.229    | 1.81   |
| 20.75     | 9708    | 93670   | 19.17 | 22.42 | 0.165    | 0.77   |

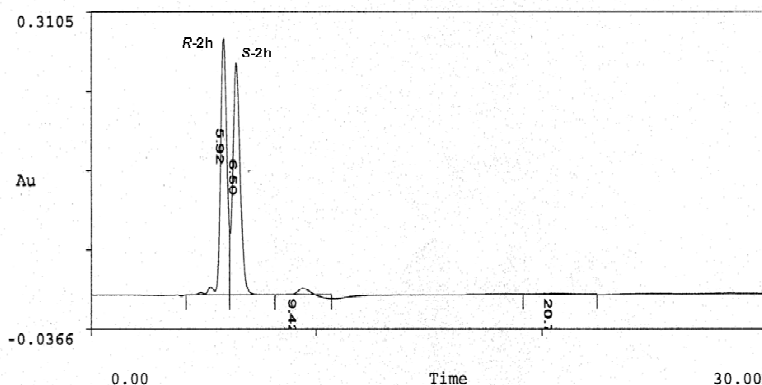

**4. 5: 1,2-bis(4-methoxyphenyl)-2-oxoethyl butyrate (*R,S*-2i) (85% yield)**

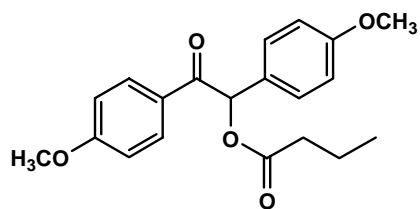

<sup>1</sup>H NMR (250 MHz, CDCl<sub>3</sub>): 7.85 (2H, d, *J*=9 Hz), 7.30 (2H, d, *J*=9 Hz), 6.80 (2H, d, *J*=8.8 Hz), 6.79 (2H, d, *J*=9.0 Hz), 6.73 (1H, s), 3.75 (3H, s), 3.70 (3H, s), 2.42 (1H, c, *J*=7.6 Hz), 2.30 (1H, c, *J*=7.6 Hz), 1.63 (2H, sex, *J*=7.4 Hz), 0.90 (3H, t, *J*=7.4 Hz). <sup>13</sup>C NMR (63 MHz, CDCl<sub>3</sub>) δ (ppm): 192.7, 174.4, 164.8, 160.3, 134.6, 130.1, 129.0, 127.7, 113.4, 112.8, 75.6, 54.4, 54.2, 34.8, 17.6, 13.1. Anal. Calcd. for C<sub>20</sub>H<sub>22</sub>O<sub>5</sub>: C, 70.16; H, 6.48. Found: C, 68.75; H, 6.28.

HPLC analysis (n-hexane/2-propanol, 90/10; Flow 0.8 mL/min): retention time: (*R*)-2i= 6.57 min, (*S*)-2i= 9.17 min.

| Retention | Height  | Area    | Start | End   | % Height | % Area |
|-----------|---------|---------|-------|-------|----------|--------|
| 6.57      | 2776553 | 6965420 | 5.94  | 7.18  | 59.164   | 48.80  |
| 7.44      | 184227  | 540208  | 7.19  | 8.10  | 3.926    | 3.70   |
| 9.17      | 1732168 | 6766009 | 8.48  | 11.18 | 36.910   | 47.40  |

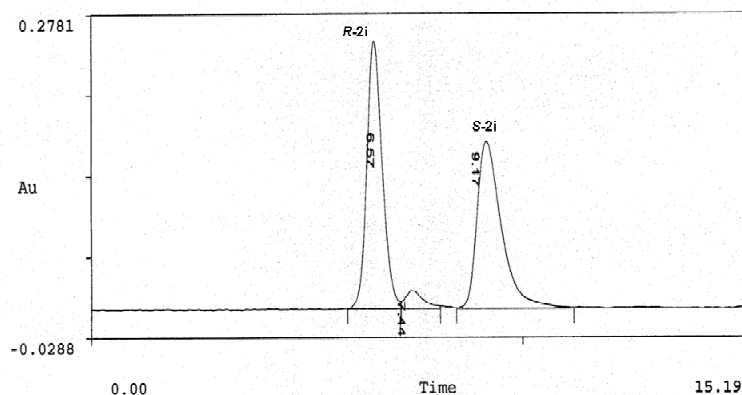

#### 4. 6: 1,2-bis(4-ethoxyphenyl)-2-oxoethyl butyrate (*R,S*-2j) (83% yield)

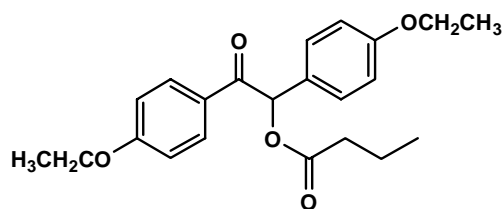

$^1\text{H NMR}$  (250 MHz,  $\text{CDCl}_3$ ): 7.83 (2H, d,  $J=9$  Hz), 7.30 (2H, d,  $J=8.8$  Hz), 6.8 (2H, d,  $J=8.8$  Hz), 6.76 (2H, d,  $J=9.0$  Hz), 6.72 (1H, s), 3.94 (4H, c,  $J=7$  Hz), 2.42 (1H, c,  $J=7.7$  Hz), 2.30 (1H, c,  $J=7.6$  Hz), 1.63 (2H, sex,  $J=7.4$  Hz), 1.33 (t, 3H,  $J=7$  Hz), 1.31 (t, 3H,  $J=7$  Hz), 0.89 (3H, t,  $J=7.4$  Hz).  $^{13}\text{C NMR}$  (63 MHz,  $\text{CDCl}_3$ )  $\delta$  (ppm): 192.7, 173.7, 163.4, 160.0, 131.5, 130.4, 127.7, 126.4, 115.3, 114.6, 77.1, 64.1, 63.8, 36.3, 18.6, 15.1, 15.0, 13.1. Anal. Calcd. for  $\text{C}_{22}\text{H}_{26}\text{O}_5$ : C, 71.33; H, 7.07. Found: C, 70.11; H, 6.90.

HPLC analysis (n-hexane/2-propanol, 90/10; Flow 0.8 mL/min): retention time: (*R*)-2j= 5.33 min, (*S*)-2j= 6.50 min.

| File - \ictalk\integrat\7JUL2275.011 |         |         |       |      |          |        |
|--------------------------------------|---------|---------|-------|------|----------|--------|
| Retention                            | Height  | Area    | Start | End  | % Height | % Area |
| 5.33                                 | 1826883 | 5849118 | 3.18  | 5.67 | 46.888   | 48.30  |
| 6.50                                 | 2020861 | 5981228 | 5.68  | 7.67 | 51.867   | 49.41  |
| 8.33                                 | 48490   | 263911  | 7.68  | 9.33 | 1.245    | 2.11   |

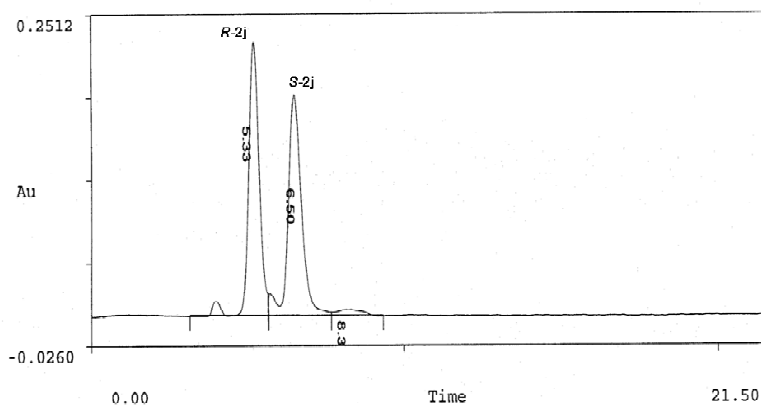

**5. Synthesis of acetylated products: 2-oxo-1,2-diphenylethyl acetate (*R,S*-2a),  
1,2-di(furan-2-yl)-2-oxoethyl acetate (*R,S*-2c)**

**5. 1: 2-oxo-1,2-diphenylethyl acetate (*R,S*-2a)**

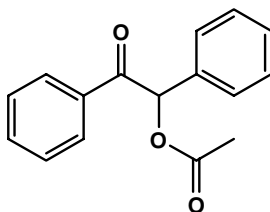

**1a** (4.2 g, 19.78 mmol) was solved in glacial acetic acid (4mL) and acetic anhydride (4 mL). 0.4 mL of H<sub>2</sub>SO<sub>4</sub> were slowly added. The mixture was stirred in a 100°C bath during 30 min and then was added over 50 mL of water. After 2 h the flask was introduced in an ice bath and the product started to precipitate. It was filtered and the yellow solid was recrystallized, producing white crystals of **2a** (3.97 g, 79% yield).

<sup>1</sup>H NMR (250 MHz, CDCl<sub>3</sub>) δ (ppm): 7.96 (1H, m), 7.93 (1H, m), 7.53 (1H, t, J=2.3 Hz), 7.50 (1H, t, J=1.3 Hz), 7.48 (1H, d, J=1.9 Hz), 7.46 (1H, d, J=1.8 Hz), 7.43 (1H, c, J=2.4 Hz), 7.41 (1H, q, J=1.4 Hz), 7.38 (1H, d, J=2 Hz), 7.36 (1H, d, J=1.9 Hz),

6.87, 2.54.  $^{13}\text{C}$  RMN (63 MHz,  $\text{CDCl}_3$ )  $\delta$  (ppm): 133.9, 129.7, 129.5, 129.1, 129.0, 129.0, 78.0, 21.2. Anal. Calcd. for  $\text{C}_{16}\text{H}_{14}\text{O}_3$ : C, 75.57; H, 5.55. Found: C, 74.28; H, 5.45.

HPLC analysis (n-hexane/2-propanol, 90/10; Flow 0.8 mL/min): retention time:

**(R)-2a** = 5.55 min, **(S)-2a** = 6.97 min.

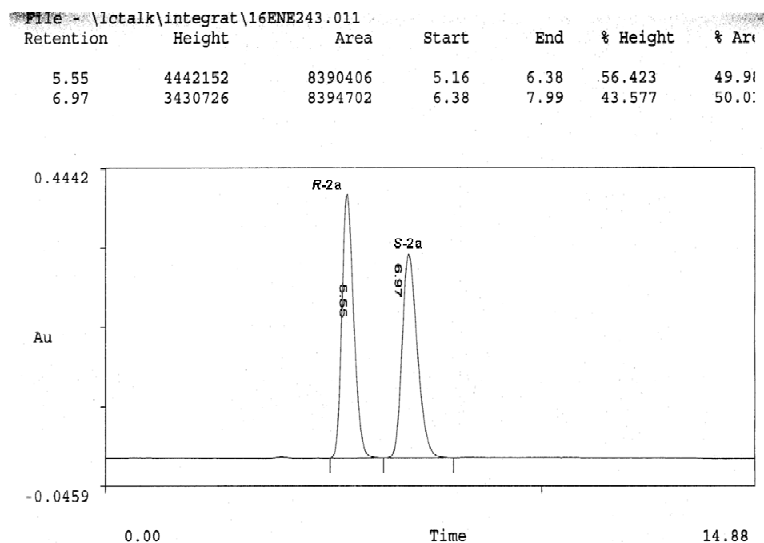

## 5. 2: 1,2-di(furan-2-yl)-2-oxoethyl acetate (**R,S-2c**)

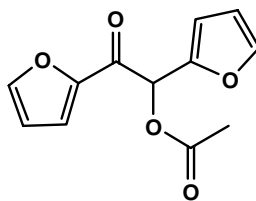

2-Furoin (200mg, 1.04mmol) was solved in 11mL of THF and 155  $\mu\text{L}$  of DBU and 111.43  $\mu\text{L}$  of acetyl chloride were added. After 24 h the product was purified by silica gel column chromatography (n-hexane/ethyl acetate, 7/2 (v/v)). The fractions were evaporated under vacuum, collecting a white solid (206 mg, 85% yield).

$^1\text{H}$  NMR (250 MHz,  $\text{CDCl}_3$ )  $\delta$  (ppm): 7.51 (1H, dd,  $J=1.6$  Hz,  $J=0.7$  Hz), 7.39 (1H, dd,  $J=1.8$  Hz,  $J=0.7$  Hz), 7.19 (1H, s), 6.69 (1H, s), 6.46 (1H, dd,  $J=3.6$  Hz,  $J=1.7$  Hz), 6.44 (1H, dd,  $J=3.3$  Hz,  $J=0.3$  Hz), 6.32 (1H, dd,  $J=3.3$  Hz,  $J=1.8$  Hz), 2.14

(3H, s).  $^{13}\text{C}$  NMR (63 MHz,  $\text{CDCl}_3$ )  $\delta$  (ppm): 178.6, 169.1, 149.1, 148.4, 146.1, 145.4, 143.2, 119.5, 110.7, 110.0, 69.3, 19.6. Anal. Calcd. for  $\text{C}_{12}\text{H}_{10}\text{O}_5$ : C, 61.54; H, 4.30. Found: C, 60.43; H, 4.21.

HPLC analysis (n-hexane/2-propanol, 90/10; Flow 0.8 mL/min): retention time: (**R**)-**2c** = 7.08 min, (**S**)-**2c** = 7.73 min.

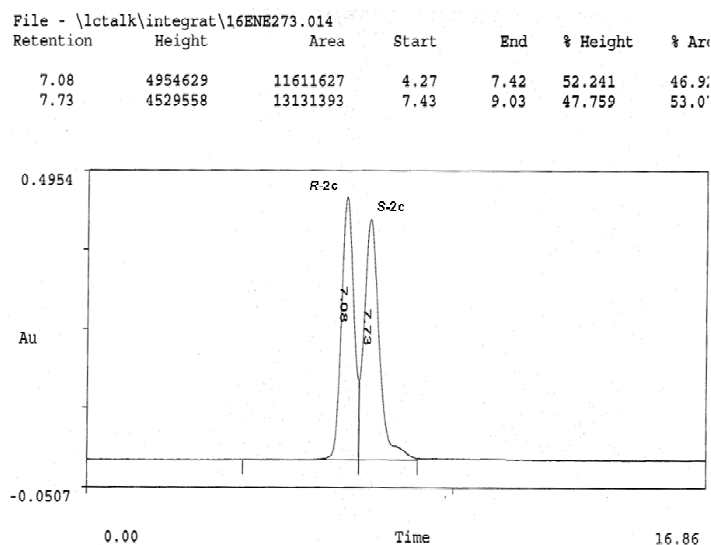

## 6. General methods for transesterification (Kinetic resolution)

The reactions were generally performed in the following manner: 0.47 mmol of **1** were dissolved in 5 mL of organic solvent (dry THF) and 2.82 mmol of acyl donor were added. The reaction was started by the addition of 20 mg/mL of Lipase TL® (previously dried under vacuum overnight), and the mixture was stirred under argon atmosphere. The reactions were monitored by HPLC, taking 20  $\mu\text{L}$  at different time intervals for analysis. As THF may damage the chiral column (Chiralcel OD®), each sample was evaporated under vacuum and the solid collected was re-solved n-hexane/2-propanol (50:50, v/v) before analyzing by HPLC (**1a**,  $\lambda_{\text{max}}$ =246 nm; **2a** and **2b**,  $\lambda_{\text{max}}$ =243 nm; **1b**,  $\lambda_{\text{max}}$ =273 nm; **2c** and **2d**,  $\lambda_{\text{max}}$ =273 nm; **1c**,  $\lambda_{\text{max}}$ =255 nm; **2e**,  $\lambda_{\text{max}}$ =252 nm; **1d**,  $\lambda_{\text{max}}$ =261 nm; **2f** and **2g**,  $\lambda_{\text{max}}$ =249 nm; **1e**,  $\lambda_{\text{max}}$ =250 nm; **2h**,

$\lambda_{\max}$ =247 nm; **1f**,  $\lambda_{\max}$ =276 nm; **2i**,  $\lambda_{\max}$ =274 nm; **1g**,  $\lambda_{\max}$ =278 nm; **2j**,  $\lambda_{\max}$ =275 nm).

The conversions and ee values were determined by the HPLC data.

When the reaction was finished the product (**2**) was purified by silica gel column chromatography (n-hexane/ethyl acetate 5:1, v/v) and the optical rotation was measured. NMR spectra of optically pure acylated benzoin s were similar to those ones of the racemic mixtures previously described on each case.

### 6.1. Transesterification of (*R,S*)-**1a** with vinyl acetate:

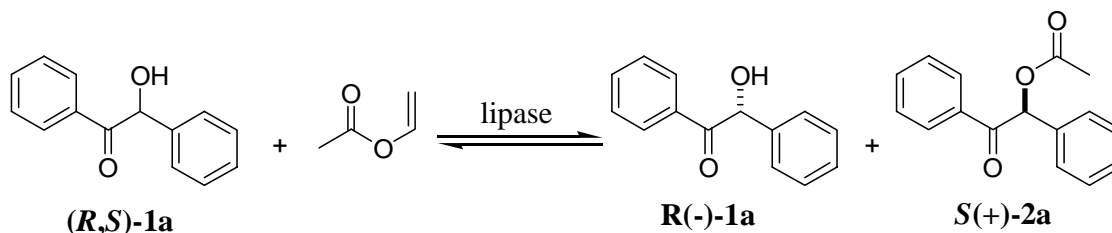

The NMR data of (*S*)-**2a** are similar to those of the racemic (*R,S*)-**2a**.

HPLC analysis (n-hexane/2-propanol, 90/10; Flow 0.8 mL/min): retention times:

(*R*)-**1a**= 13.11 min, (*S*)-**1a**= 9.52 min., (*S*)-**2a**= 6.90 min. **1a**,  $\lambda_{\max}$ =246 nm; **2a**,  $\lambda_{\max}$ =243 nm. Conversions and e.e are shown in manuscript (Table 2).

(*S*)-**2a**:  $[\alpha]_{\text{D}}^{20}$ : +91.8 (*c* 0.2 CHCl<sub>3</sub>)

### 6.2. Transesterification of (*R,S*)-**1a** with vinyl butyrate:

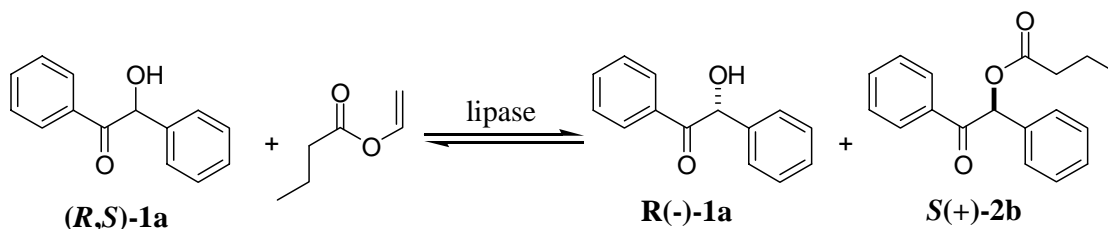

The NMR data of (*S*)-**2b** are similar to those of the racemic (*R,S*)-**2b**.

HPLC analysis (n-hexane/2-propanol, 90/10; Flow 0.8 mL/min): retention times: **(R)-1a**= 13.11 min, **(S)-1a**= 9.52 min., **(S)-2b**= 5.53 min. **1a** ;  $\lambda_{\max}$ =246 nm; **2b**,  $\lambda_{\max}$ =243 nm. Conversions and e.e are shown in manuscript (Table 2).

**(S)-2b**:  $[\alpha]_{\text{D}}^{20}$ : +117.8 (*c* 3.5 CHCl<sub>3</sub>)

### 6.3. Transesterification of **(R,S)-1b** with vinyl acetate:

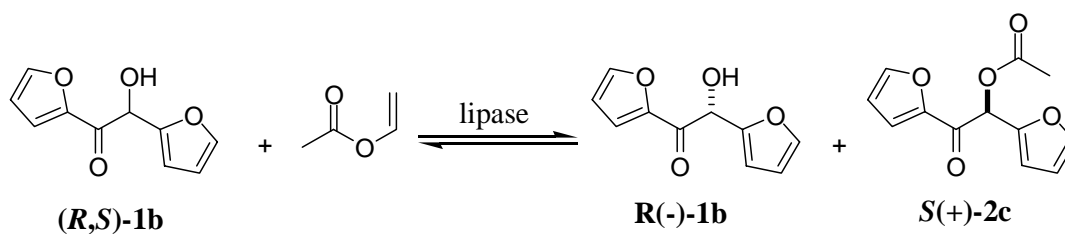

The NMR data of **S(+)-2c** are similar to those of the racemic **(R,S)-2c**.

HPLC analysis (n-hexane/2-propanol, 90/10; Flow 0.8 mL/min): retention times: **(R)-1b**= 13.33 min, **(S)-1b**= 11.54 min., **(S)-2c**= 7.75 min. **1b** ;  $\lambda_{\max}$ =273 nm; **2c**,  $\lambda_{\max}$ =273 nm. Conversions and e.e are shown in manuscript (Table 2).

**(S)-2c**:  $[\alpha]_{\text{D}}^{20}$ : +103.8 (*c* 3.0 CHCl<sub>3</sub>)

### 6.4. Transesterification of **(R,S)-1b** with vinyl butyrate:

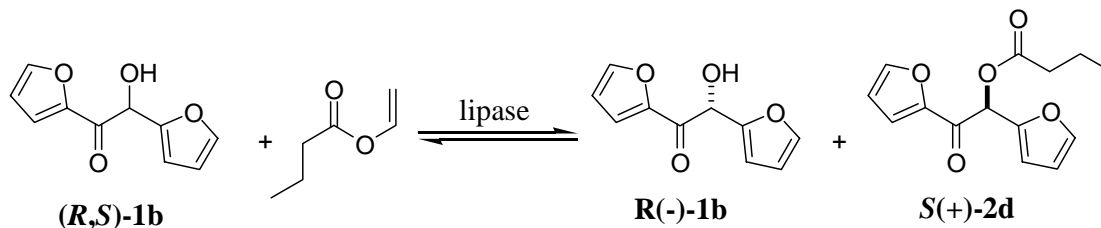

The NMR data of **S(+)-2d** are similar to those of the racemic **(R,S)-2d**.



HPLC analysis (n-hexane/2-propanol, 90/10; Flow 0.8 mL/min): retention times: **(R)-1b**= 13.33 min, **(S)-1b**= 11.54 min., **(S)-2d**= 6.40 min. **1b** ;  $\lambda_{\text{max}}$ =273 nm; **2d**,  $\lambda_{\text{max}}$ =273 nm. Conversions and e.e are shown in manuscript (Table 2).

#### 6.5. Transesterification of **(R,S)-1c** with vinyl acetate:

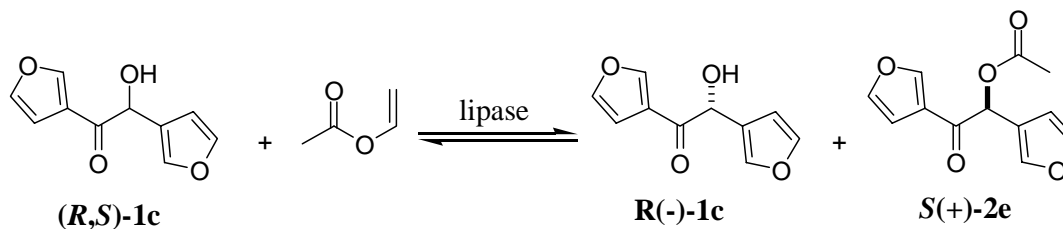

HPLC analysis (n-hexane/2-propanol, 90/10; Flow 0.8 mL/min): retention times: **(R)-1c**= 12.88 min, **(S)-1c**= 11.91 min., **(S)-2e**= 7.52 min. **1c** ;  $\lambda_{\text{max}}$ =255 nm; **2e**,  $\lambda_{\text{max}}$ =252 nm. Conversions and e.e are shown in manuscript (Table 2).

#### 6.6. Transesterification of **(R,S)-1d** with vinyl acetate:

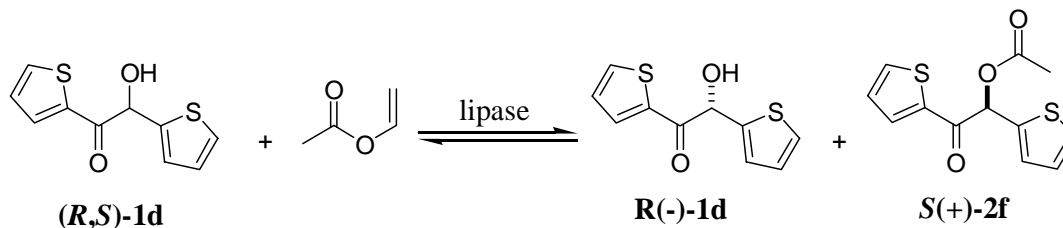

HPLC analysis (n-hexane/2-propanol, 90/10; Flow 0.8mL/min): retention times: **(R)-1d**= 11.15 min, **(S)-1d**= 10.13 min., **(S)-2f**= 6.20 min. **1d** ;  $\lambda_{\text{max}}$ =261 nm; **2f**,  $\lambda_{\text{max}}$ =249 nm. Conversions and e.e are shown in manuscript (Table 2).

#### 6.7. Transesterification of **(R,S)-1d** with vinyl butyrate:

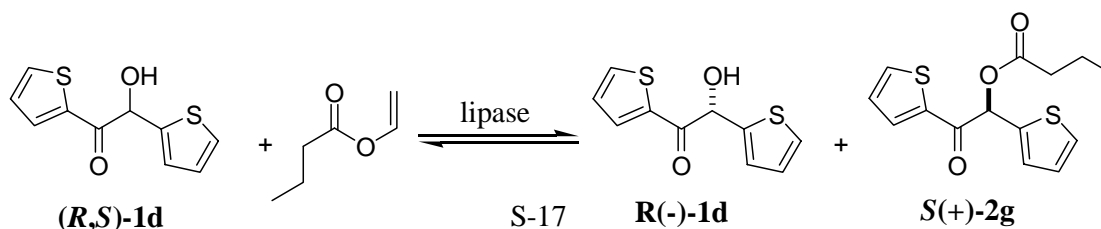

The NMR data of *S*(+)-**2g** are similar to those of the racemic (*R,S*)-**2g**.

HPLC analysis (n-hexane/2-propanol, 90/10; Flow 0.8 mL/min): retention times:

(*R*)-**1d**= 11.15 min, (*S*)-**1d**= 10.13 min., (*S*)-**2g**= 6.64 min. **1d** ;  $\lambda_{\max}$ =261 nm; **2g**,

$\lambda_{\max}$ =249 nm. Conversions and e.e are shown in manuscript (Table 2).

(*S*)-**2g**:  $[\alpha]_{\text{D}}^{20}$ : +95.9 (*c* 3.15 CHCl<sub>3</sub>)

#### 6.8. Transesterification of (*R,S*)-**1e** with vinyl butyrate:

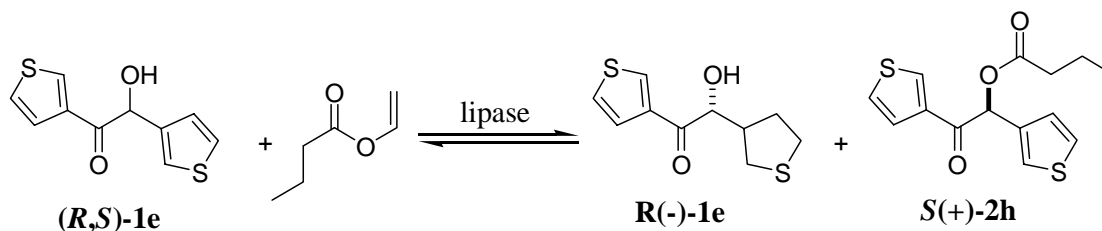

The NMR data of *S*(+)-**2h** are similar to those of the racemic (*R,S*)-**2h**.

HPLC analysis (n-hexane/2-propanol, 90/10; Flow 0.8 mL/min): retention times:

(*R*)-**1e**= 12.60 min, (*S*)-**1e**= 10.72 min., (*S*)-**2h**= 6.50 min. **1e** ;  $\lambda_{\max}$ =250 nm; **2h**,

$\lambda_{\max}$ =247 nm. Conversions and e.e are shown in manuscript (Table 2).

(*S*)-**2h**:  $[\alpha]_{\text{D}}^{20}$ : +92.1 (*c* 2.6 CHCl<sub>3</sub>)

#### 6.9. Transesterification of (*R,S*)-**1f** with vinyl butyrate:

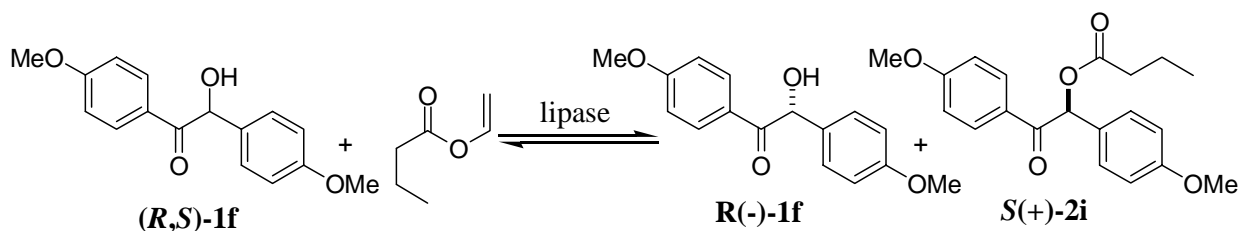

The NMR data of *S*(+)-**2i** are similar to those of the racemic (*R,S*)-**2i**.

HPLC analysis (n-hexane/2-propanol, 90/10; Flow 0.8 mL/min): retention times:

(*R*)-**1f**= 11.28 min, (*S*)-**1f**= 10.04 min., (*S*)-**2i**= 9.00 min. **1f** ;  $\lambda_{\max}$ =276 nm; **2i**,  $\lambda_{\max}$ =274 nm. Conversions and e.e are shown in manuscript (Table 2).

(*S*)-**2i**:  $[\alpha]_{\text{D}}^{20}$ : +104.0 (*c* 3.7 CHCl<sub>3</sub>)

#### 6.9. Transesterification of (*R,S*)-**1g** with vinyl butyrate:

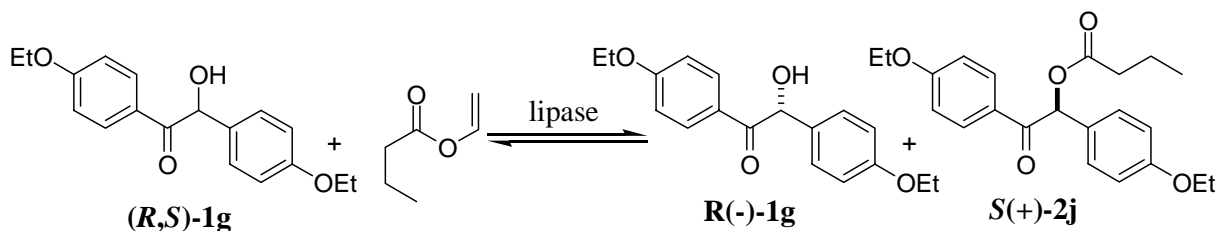

The NMR data of *S*(+)-**2j** are similar to those of the racemic (*R,S*)-**2j**.

HPLC analysis (n-hexane/2-propanol, 90/10; Flow 0.8mL/min): retention times:

(*R*)-**1g**= 8.00 min, (*S*)-**1g**= 7.52 min., (*S*)-**2j**= 6.50 min. **1g** ;  $\lambda_{\max}$ =278 nm; **2j**,  $\lambda_{\max}$ =275 nm. Conversions and e.e are shown in manuscript (Table 2).

(*S*)-**2j**:  $[\alpha]_{\text{D}}^{20}$ : +94.6 (*c* 3.2 CHCl<sub>3</sub>).

### 7. General procedure for the Dynamic Kinetic Resolution.

**7. 1. One pot DKR:** 12 mg of SHVO's catalyst (0.011 mmol) and 50mg of lipase TL<sup>®</sup> from *Pseudomonas stutzeri* were added to a 5 ml flask, and 2,5 mL of solution of (*R,S*)-**1a** 94.22 mM in anhydrous THF were added. The reaction was started adding the acylating agent trifluoroethyl butyrate (200  $\mu$ L, 1.32 mmol). The mixture was stirred at 50°C under argon. Each sample taken was evaporated under vacuum and

the solid collected was re-solved in n-hexane/2-propanol (50:50, v/v) before analyzing by HPLC.

**7. 2. Sequential DKR:** 25 mg of lipase TL<sup>®</sup> from *Pseudomonas stutzeri* were added to 2.5 mL of a solution 94.22 mM of **1a** in anhydrous THF. The reaction was started by addition of 300  $\mu$ L of vinyl butyrate (2.36 mmol) and it was stirred at 50°C under argon for 2.75 h, until 30% conversion was reached. Then, the mixture was filtered under vacuum and the THF and remnant vinyl butyrate were evaporated. The solid collected (70% substrate; 30% product) was re-solved in 2.5 mL of anhydrous THF, and 6 mg of SHVO's catalyst (0.0055 mmol) and 200  $\mu$ L of trifluoroethyl butyrate (1.32 mmol) were added. The reaction was stirred again at 50°C. After 17 h, 25 mg of fresh enzyme were added, and the reaction was followed until almost no remnant substrate was detected by HPLC. 92% conversion and e.e.<sub>p</sub>>99.9% were reached.

FA6PHBZBUT

2-oxo-1,2-diphenylethyl butyrate (*R,S*-2b)

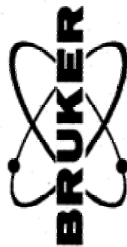

8.5 8.0 7.5 7.0 6.5 6.0 5.5 5.0 4.5 4.0 3.5 3.0 2.5 2.0 1.5 1.0 ppm

7.55 7.54 7.53 7.52 7.51 7.50 7.49 7.48 7.47 7.46 7.45 7.43 7.42 7.41 7.40 7.39 7.38 7.37 7.36 7.35 7.29 6.89

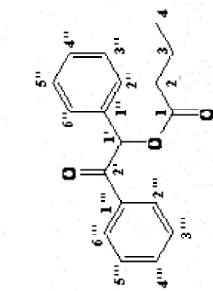

Current Data Parameters  
NAME Jul06-2005-iny  
EXPNO 52  
PROCNO 1

F2 - Acquisition Parameters  
Date\_ 20050707  
Time\_ 9.38  
INSTRUM spect  
PROBHD 5 mm QNP 1H/1  
PULPROG zg30  
TD 32768  
SOLVENT CDCl3  
NS 16  
DS 2  
SWH 4222.973 Hz  
FIDRES 0.128875 Hz  
AQ 3.8797812 sec  
RG 2580.3  
DM 118.400 usec  
DE 20.00 usec  
TE 293.5 K  
D1 1.00000000 sec  
TD0 1

CHANNEL f1  
NUC1 1H  
P1 9.75 usec  
PL1 4.00 dB  
SF01 250.1316704 MHz  
F2 - Processing parameters  
SI 32768  
SF 250.1300000 MHz  
WDW EM  
SSB 0  
LB 0.30 Hz  
GB 0  
PC 0.50

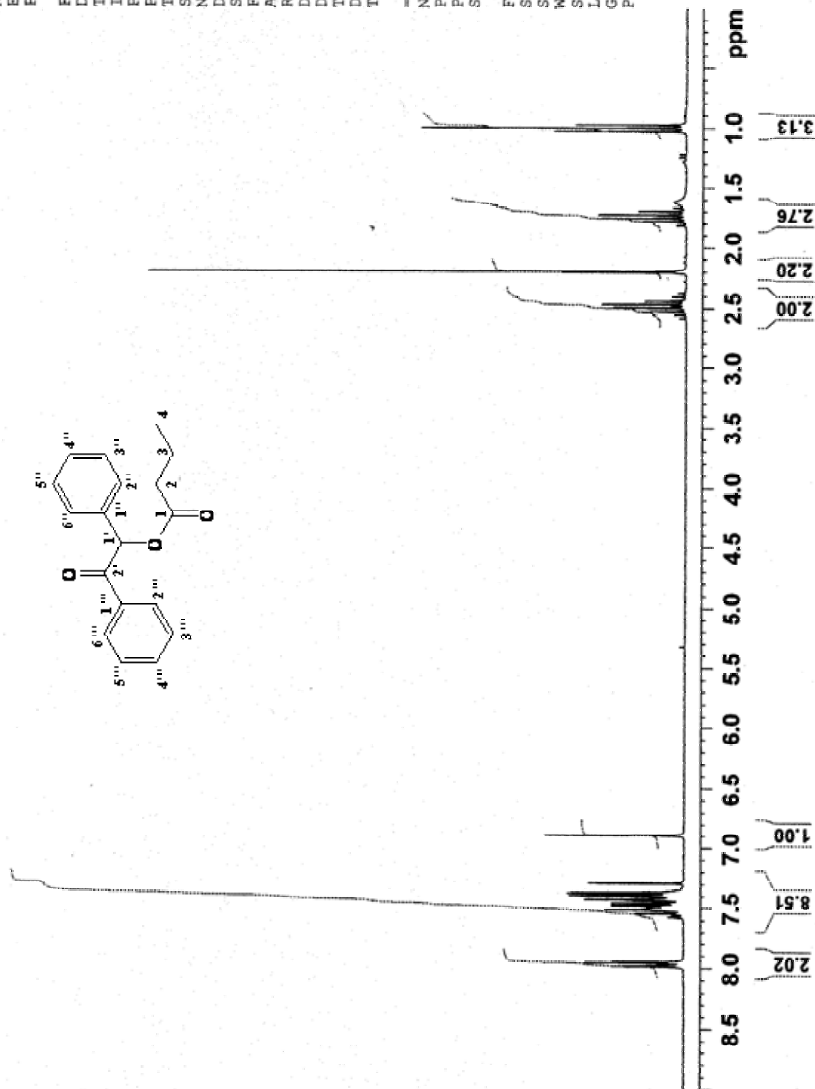

FA6PHB2BUT

2-oxo-1,2-diphenylethyl butyrate (*R,S*-2b)

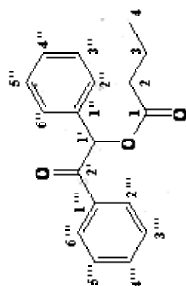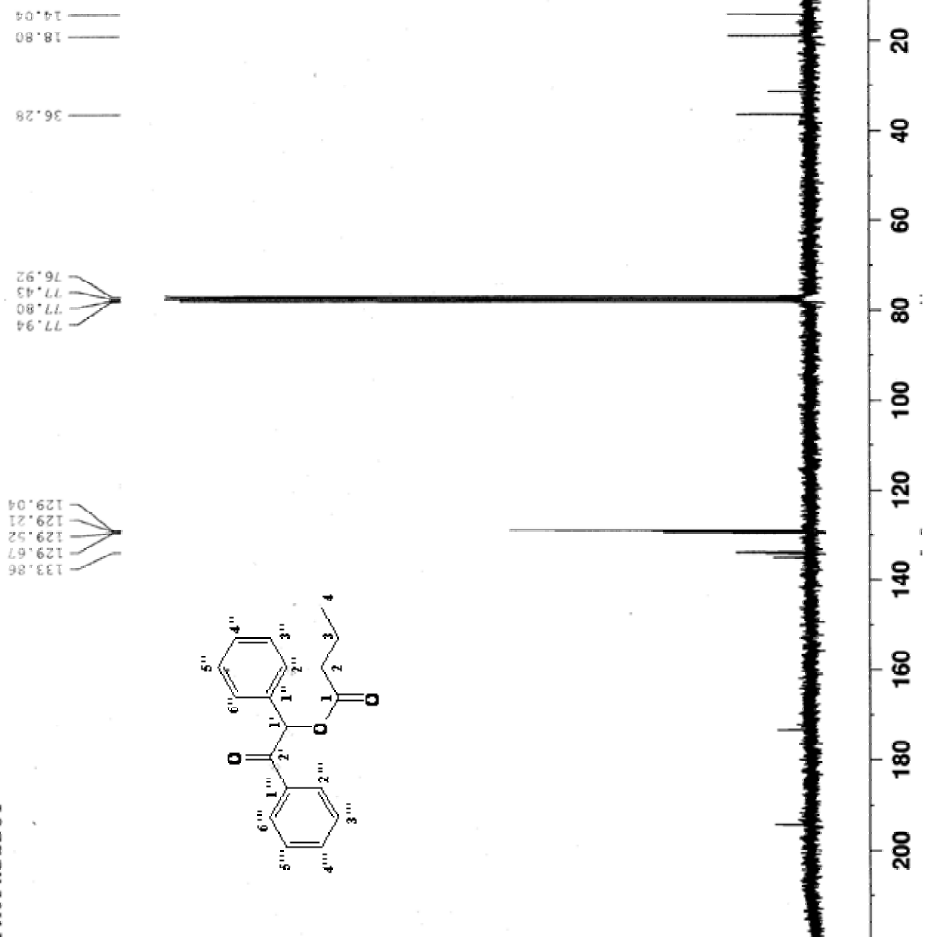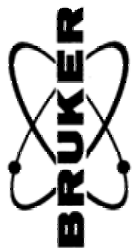

Current Data Parameters  
NAME Jul06-2005-iny  
EXPNO 50  
PROCNO 1

F2 - Acquisition Parameters  
Date\_ 20050707  
Time 9.17  
INSTRUM spect  
PROBHD 5 mm QNP 1H/1  
PULPROG zgpg30  
TD 65536  
SOLVENT CDCl3  
NS 512  
DS 4  
SWH 15060.241 Hz  
FIDRES 0.229801 Hz  
AQ 2.1758451 sec  
RG 20642.5  
DW 33.200 usec  
DE 20.00 usec  
TE 293.9 K  
D1 2.0000000 sec  
d11 0.0300000 sec  
DELTA 1.8999998 sec  
TD0 1

CHANNEL f1  
NUC1 13C  
P1 18.06 usec  
PL1 6.00 dB  
SFO1 62.9015030 MHz

CHANNEL f2  
CPDPRG2 waitz16  
NUC2 1H  
PCPD2 80.00 usec  
PL2 4.00 dB  
PL12 15.51 dB  
PL13 25.00 dB  
SFO2 250.1310005 MHz

F2 - Processing parameters  
SI 32768  
SF 62.8952140 MHz  
WDW EM  
SSB 0

**BRÜKER**

F2 - Acquisition Parameters  
Date\_ 20050708

| F2 - Acquisition Parameters |                |
|-----------------------------|----------------|
| Date_                       | 20050708       |
| Time                        | 15.50          |
| INSTRUM                     | spect          |
| PROBHD                      | 1H/1           |
| PULPROG                     | 5 mm QNP       |
| TD                          | 230            |
| FID                         | 32768          |
| SSOLVENT                    | CDCl3          |
| NS                          | 16             |
| DS                          | 2              |
| SWH                         | 4222.973 Hz    |
| FIDRES                      | 0.128575 Hz    |
| AQ                          | 3.8797812 sec  |
| RG                          | 812.7          |
| ORIG                        | 118.400 usec   |
| DE                          | 20.00 usec     |
| TE                          | 293.1 K        |
| TD1                         | 1.00000000 sec |
| ID1                         | 1              |
| ID0                         |                |

```

NUC1      1H      9.75 usec
PL1       4.00 dB
PL1       250.1316704 MHz
SSFO1

```

| F2 - Processing parameters |                 |
|----------------------------|-----------------|
| SI                         | 32768           |
| SF                         | 250.1300230 MHz |
| WDW                        | EM              |
| SSB                        | 0               |
| LB                         | 0.30 Hz         |
| GB                         | 0               |
| PC                         | 0.50            |

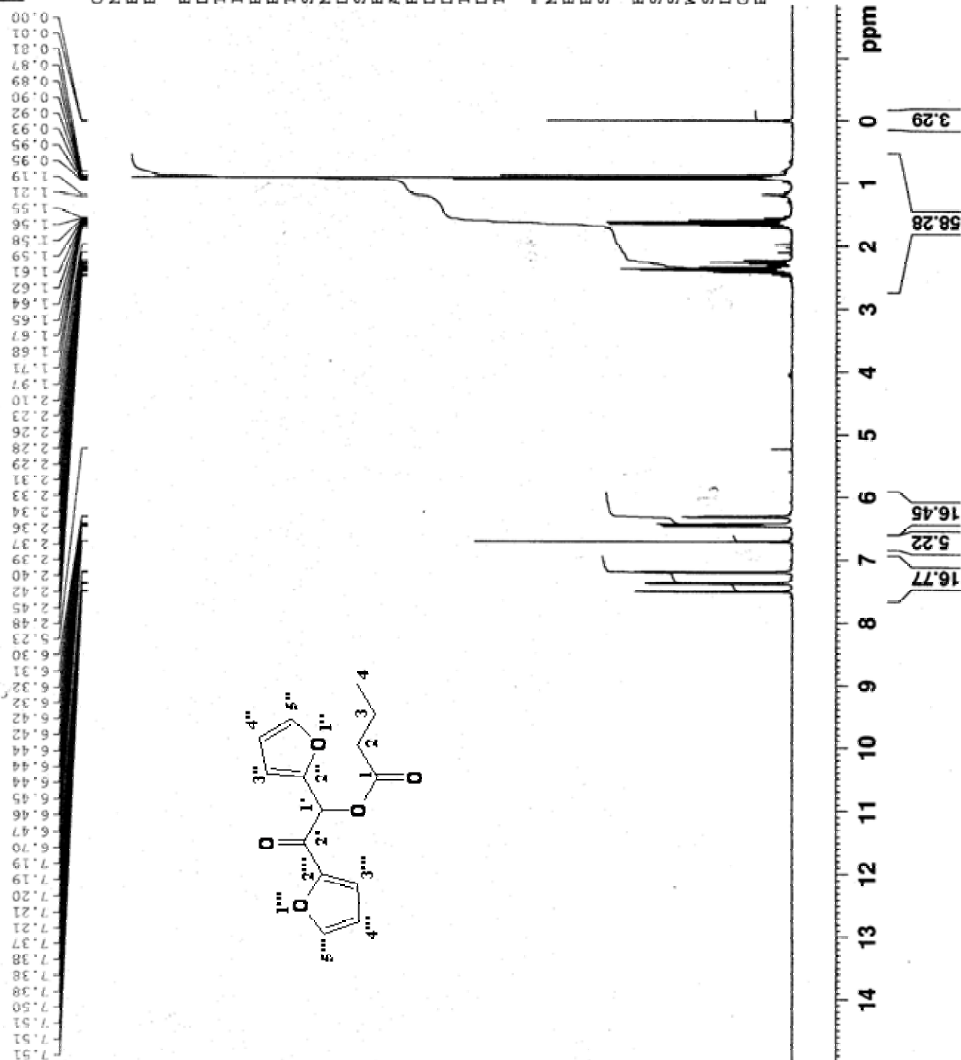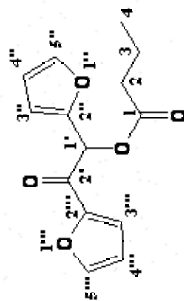

1,2-di(furan-2-yl)-2-oxoethyl butyrate (*R,S*-2d)

FS6PHEBUT

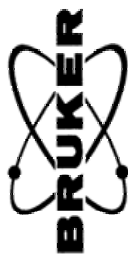

Current Data Parameters  
NAME Jul08-2005-iny  
EXPNO 21  
PROCNO 1

F2 - Acquisition Parameters  
Date\_ 20050708  
Time 17.27  
INSTRUM spect  
PROBHD 5 mm QNP 1H/1  
PULPROG zgpg30  
TD 65536  
SOLVENT CDCl3  
NS 512  
DS 4  
SWH 15060.241 Hz  
FIDRES 0.229801 Hz  
AQ 2.1758451 sec  
RG 20642.5  
DM 33.200 usec  
DE 20.00 usec  
TE 293.6 K  
D1 2.00000000 sec  
d11 0.03000000 sec  
DELTA 1.89999998 sec  
TD0 1

CHANNEL f1  
NUC1 13C  
P1 18.05 usec  
PL1 6.00 dB  
SFO1 62.9015030 MHz  
CHANNEL f2  
CPDPRG2 waltz16  
NUC2 1H  
PCPD2 80.00 usec  
PL2 4.00 dB  
PL12 15.51 dB  
PL13 25.00 dB  
SFO2 250.1310005 MHz

F2 - Processing parameters  
SI 32768  
SF 62.8953040 MHz  
EM n

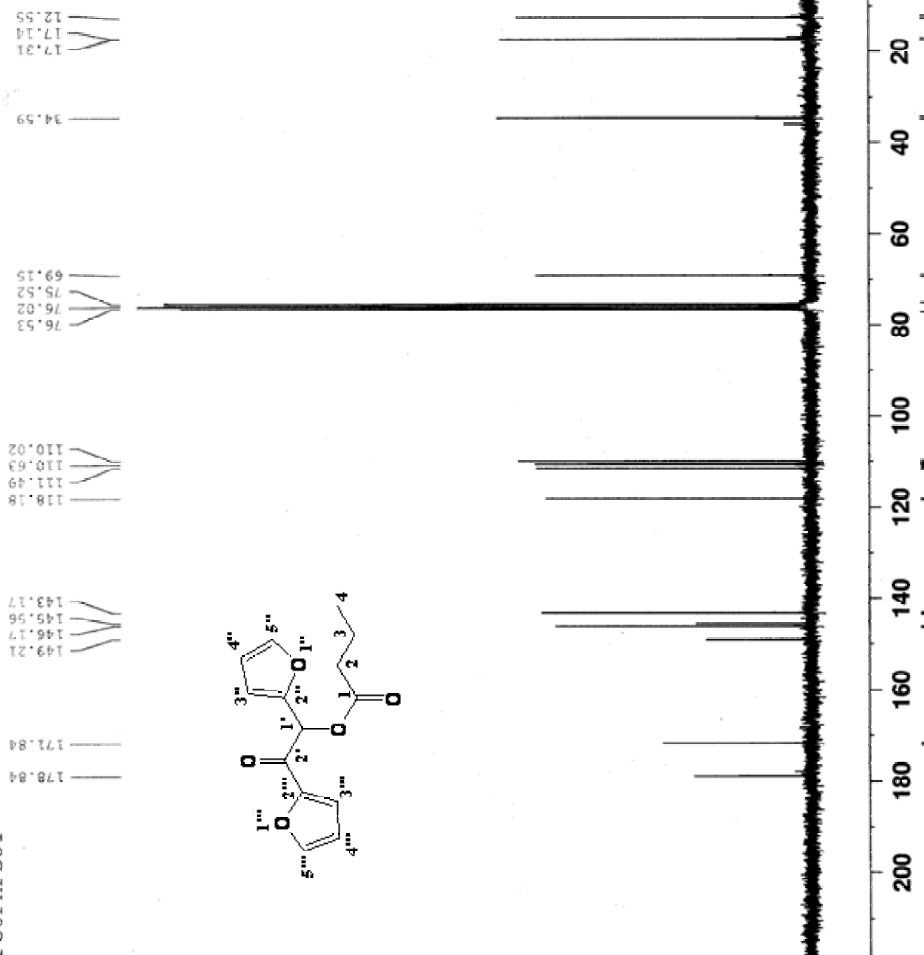



2-oxo-1,2-di(thiophen-2-yl)ethyl butyrate (*R,S*-2g)

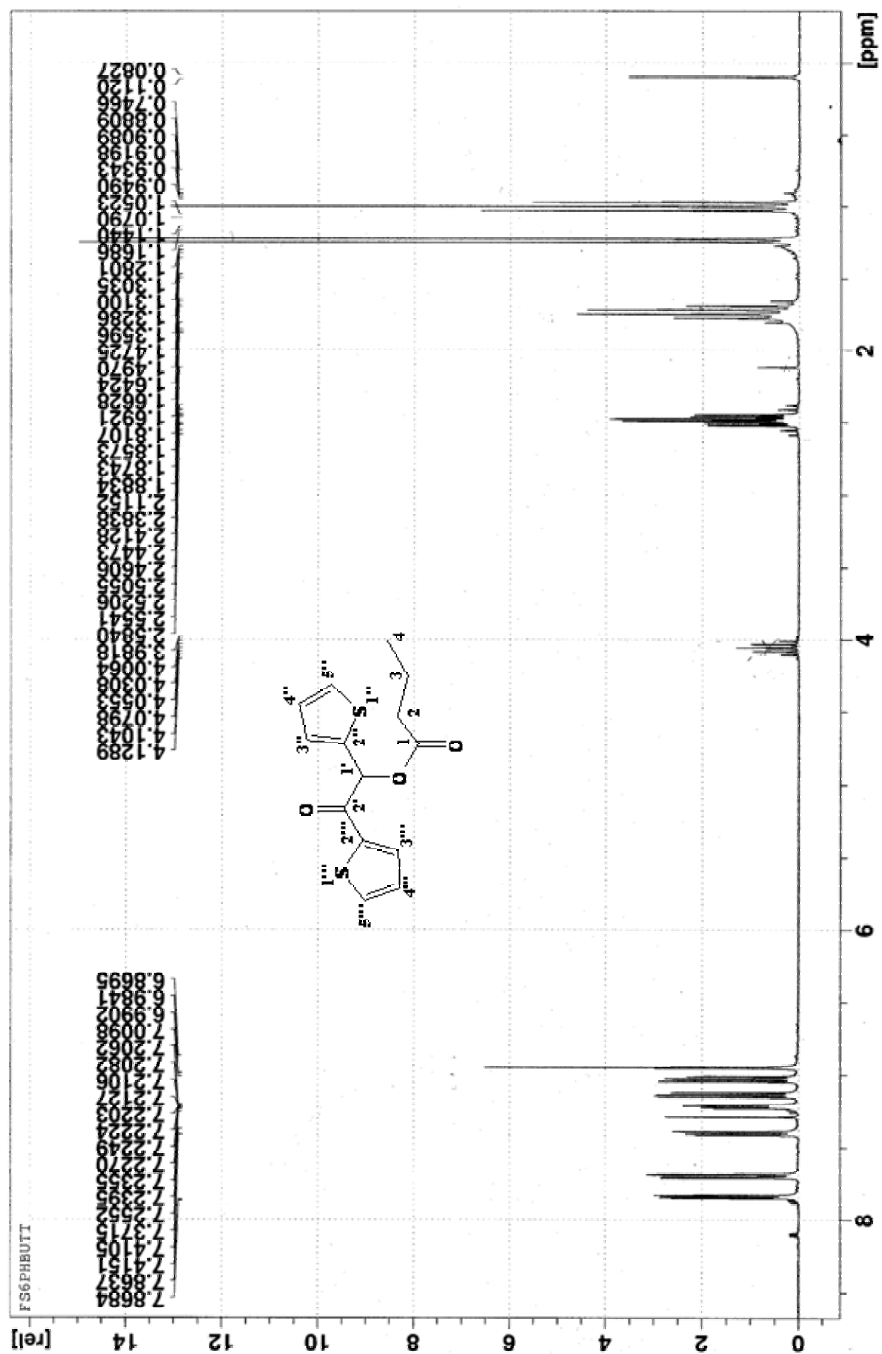



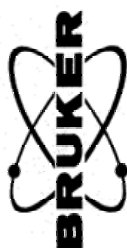

FA6PH3TBUT

2-oxo-1,2-di(thiophen-3-yl)ethyl butyrate (R,S-2h)

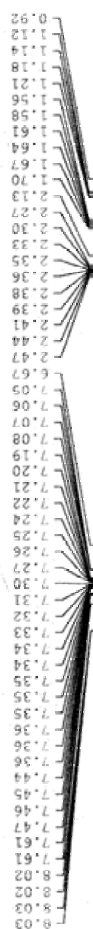

Current Data Parameters  
NAME Jul06-2005-Inv  
EXPNO 32  
PROCNO 1

F2 - Acquisition Parameters  
Date\_ 20050707  
Time 7.29  
INSTRUM spect  
PROBHD 5 mm QNP 1H/1  
PULPROG zg30  
TD 32768  
SOLVENT CDCl3  
NS 16  
DS 2  
SWH 4222.973 Hz  
FIDRES 0.128875 Hz  
AQ 3.8797812 sec  
RG 812.7  
DW 118.400 usec  
DE 20.00 usec  
TE 293.3 K  
D1 1.00000000 sec  
TD0 1

CHANNEL f1  
NUC1 1H  
P1 9.75 usec  
PL1 4.00 dB  
SFO1 250.1316704 MHz

F2 - Processing parameters  
SI 32768  
SF 250.1300257 MHz  
WDW EM  
SSB 0  
LB 0.30 Hz  
GB 0  
PC 0.50

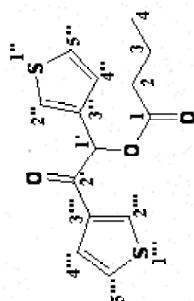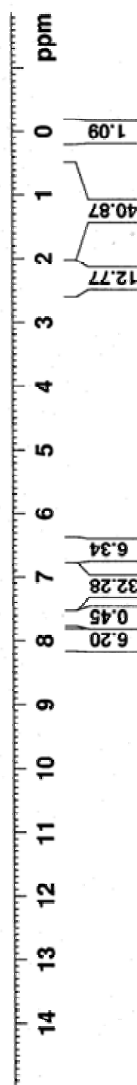

2-oxo-1,2-di(thiophen-3-yl)ethyl butyrate (R,S-2h)

FA6PH3TBUT

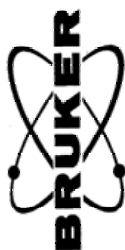

Current Data Parameters  
NAME Jul06-2005-irv  
EXPNO 30  
PROCNO 1

F2 - Acquisition Parameters  
Date\_ 20050707  
Time 7.08  
INSTRUM spect  
PROBHD 5 mm QNP 1H/1  
PULPROG zgpg30  
TD 65536  
SOLVENT CDC13  
NS 512  
DS 4  
SWH 15060.241 Hz  
FIDRES 0.229801 Hz  
AQ 2.1758451 sec  
RG 18390.4  
DM 33.200 usec  
DE 20.00 usec  
TE 293.7 K  
D1 2.00000000 sec  
d11 0.03000000 sec  
DELTA 1.89999998 sec  
TD0 1

CHANNEL f1  
NUC1 13C  
P1 18.06 usec  
PL1 6.00 dB  
SF01 62.9015030 MHz  
CHANNEL f2  
CPDPRG2 waltz16  
NUC2 1H  
PCPD2 80.00 usec  
PL2 4.00 dB  
PL12 15.51 dB  
PL13 25.00 dB  
SF02 250.1310005 MHz

F2 - Processing parameters  
SI 32768  
SF 62.8952140 MHz  
WDW EM  
SSB 0

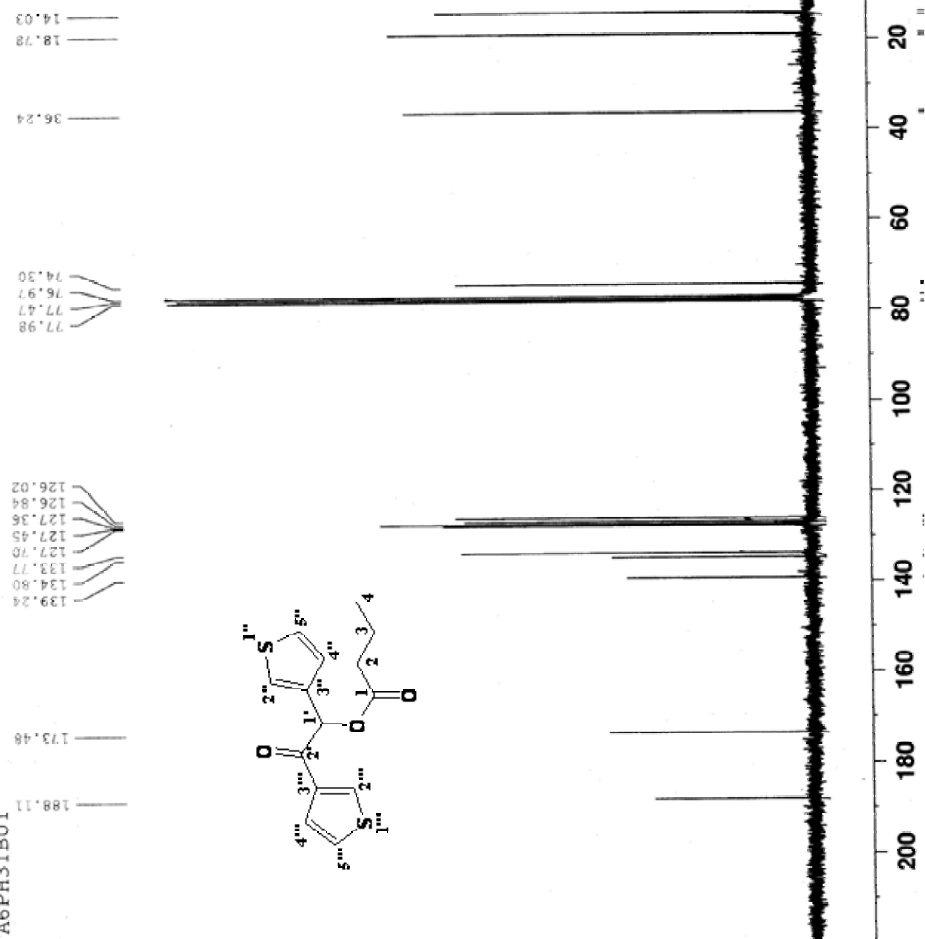

FA6PH4MBUT

1,2-bis(4-methoxyphenyl)-2-oxoethyl butyrate (*R,S*-2i)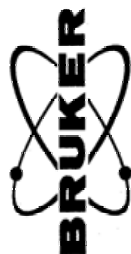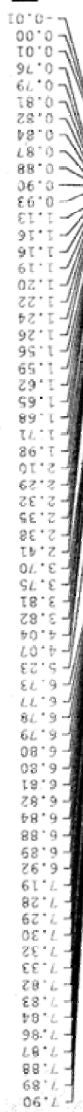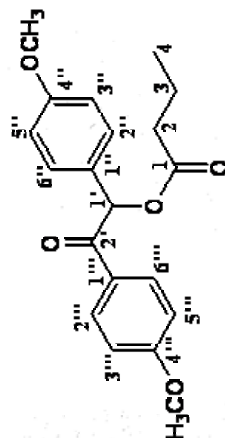

Current Data Parameters  
NAME Jul06-2005-1ny  
EXPNO 42  
PROCNO 1

F2 - Acquisition Parameters  
Date\_ 20050707  
Time 8.34  
INSTRUM spect  
PROBHD 5 mm QNP 1H/1  
PULPROG zg30  
ID 32768  
SOLVENT CDCl3  
NS 16  
DS 2  
SWH 4222.973 Hz  
FIDRES 0.128875 Hz  
AQ 3.8797812 sec  
RG 2048  
DW 118.400 usec  
DE 20.00 usec  
TE 293.5 K  
D1 1.00000000 sec  
TD0 1

CHANNEL f1  
NUC1 1H  
P1 9.75 usec  
PL1 4.00 dB  
SF01 250.1316704 MHz

F2 - Processing parameters  
SI 32768  
WDW EM  
SSB 0  
LB 0.30 Hz  
GB 0  
PC 0.50

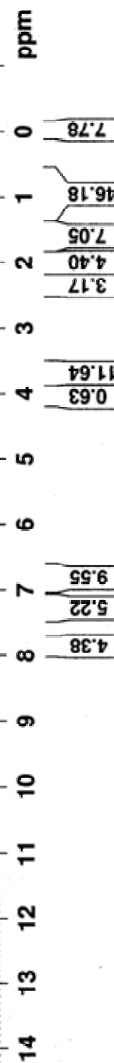

1,2-bis(4-methoxyphenyl)-2-oxoethyl butyrate (*R,S*-2i)

FA6PH4MBUT

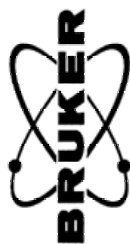

Current Data Parameters  
NAME Jui06-2005-1ny  
EXPNO 40  
PROCNO 1

F2 - Acquisition Parameters  
Date\_ 20050707  
Time 8.12  
INSTRUM spect  
PROBHD 5 mm QNP 1H/1  
PULPROG zgpg30  
TD 65536  
SOLVENT CDCl3  
NS 512  
DS 4  
SWH 15060.241 Hz  
FIDRES 0.229801 Hz  
AQ 2.1758451 sec  
RG 20642.5  
DE 33.200 usec  
TE 293.6 K  
D1 2.00000000 sec  
d11 0.03000000 sec  
DELTA 1.89999998 sec  
TD0 1

===== CHANNEL f1 =====  
NUC1 13C  
P1 18.06 usec  
PL1 6.00 dB  
SFO1 62.9015030 MHz

===== CHANNEL f2 =====  
CPDPRG2 waltz16  
NUC2 1H  
PCPD2 80.00 usec  
PL2 4.00 dB  
PL12 15.51 dB  
PL13 25.00 dB  
SFO2 250.1310005 MHz

F2 - Processing parameters  
SI 32768  
SF 62.8953043 MHz  
WDW EM

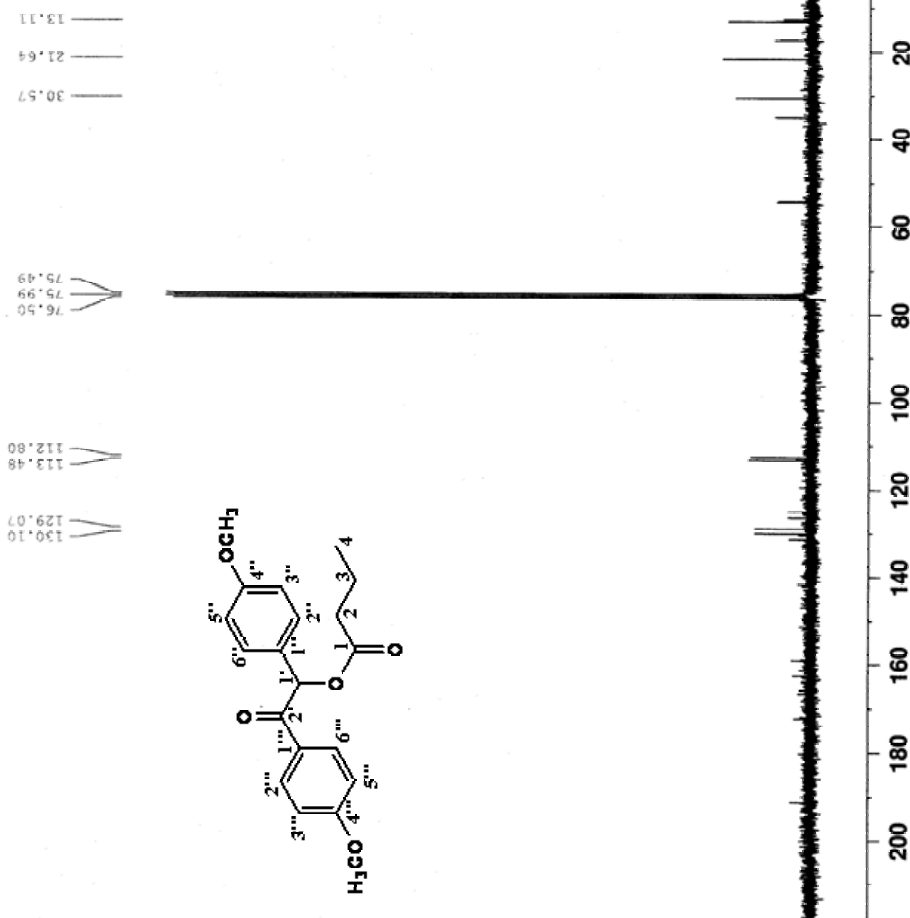

1,2-bis(4-ethoxyphenyl)-2-oxoethyl butyrate (*R,S*-2j)

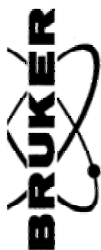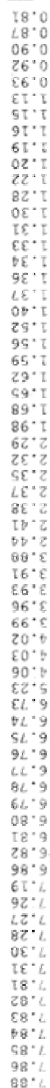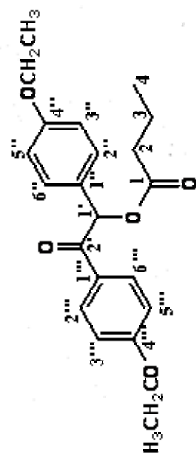

Current Data Parameters  
NAME Jul08-2005-1ny  
EXPNO 10  
PROCNO 1

F2 - Acquisition Parameters  
Date\_ 20050708  
Time 15.46  
INSTRUM spect  
PROBHD 5 mm QNP 1H/1  
PULPROG zg30  
TD 32768  
SOLVENT CDCl3  
NS 16  
DS 2  
SWH 4222.973 Hz  
FIDRES 0.128875 Hz  
AQ 3.8797812 sec  
RG 2298.8  
DW 118.400 usec  
DE 20.00 usec  
TE 293.1 K  
D1 1.0000000 sec  
TD0 1

CHANNEL f1 1H  
NUC1 1H  
P1 9.75 usec  
PL1 4.00 dB  
SFO1 250.1316704 MHz

F2 - Processing parameters  
SI 32768  
SF 250.1300246 MHz  
WDW EM  
SSB 0  
LB 0.30 Hz  
GB 0  
PC 0.50

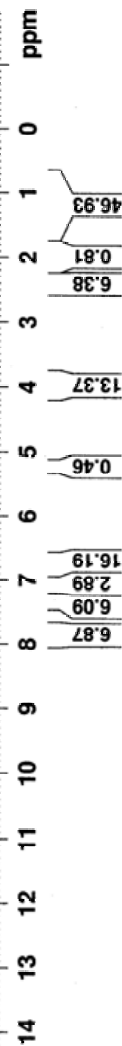

1,2-bis(4-ethoxyphenyl)-2-oxoethyl butyrate (*R,S*-2j)

FS6PH4EBUT

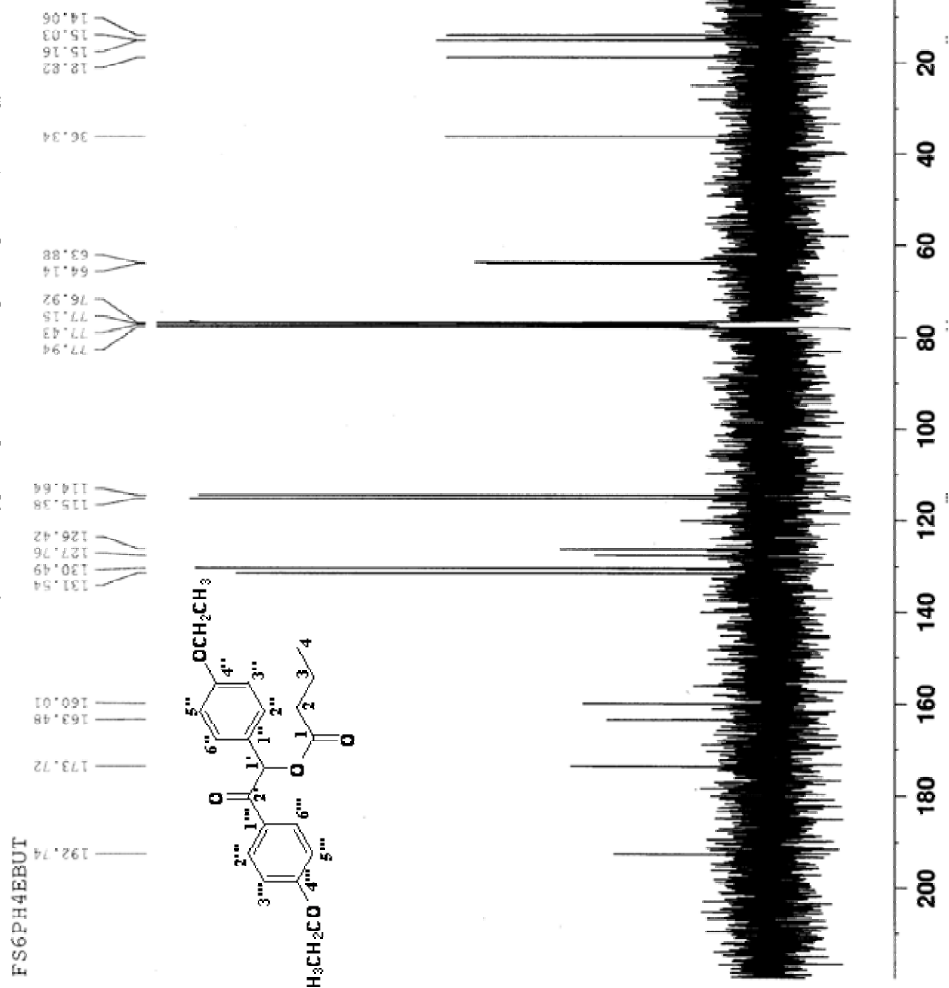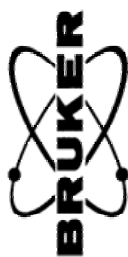

Current Data Parameters  
NAME Jul08-2005-ipy  
EXNO 11  
PROCNO 1

F2 - Acquisition Parameters  
Date\_ 20050708  
Time 16.23  
INSTRUM spect  
PROBHD 5 mm QNP 1H/1  
PULPROG zgpg30  
TD 65536  
SOLVENT CDCl3  
NS 512  
DS 4  
SWH 15060.241 Hz  
FIDRES 0.229801 Hz  
AQ 2.1758451 sec  
RG 20642.5  
DW 33.200 usec  
DE 20.00 usec  
TE 293.5 K  
D1 2.00000000 sec  
d11 0.03000000 sec  
DELTA 1.89999998 sec  
TDO 1

CHANNEL f1  
NUC1 13C  
P1 18.06 usec  
PL1 6.00 dB  
SFO1 62.9015030 MHz

CHANNEL f2  
waltz15  
CPDPRG2  
NUC2 1H  
PCPD2 80.00 usec  
PL2 4.00 dB  
PL12 15.51 dB  
PL13 23.00 dB  
SFO2 250.1310005 MHz

F2 - Processing parameters  
SI 32768  
SF 62.8952140 MHz  
EM 1



# 1,2-di(furan-2-yl)-2-oxoethyl acetate (*R,S*-2c)

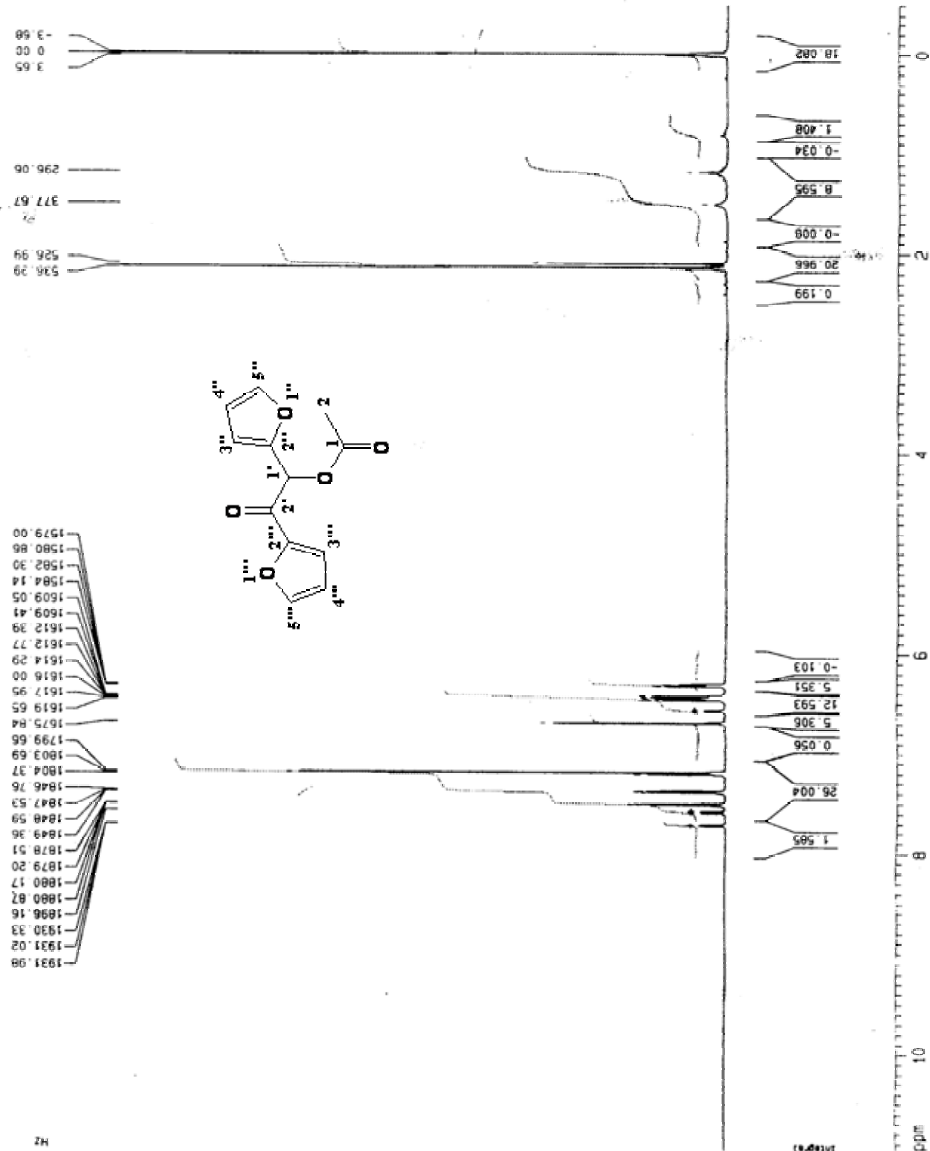

Current Data Parameters  
 Name: 8-Jul02-2014-11y  
 EXPNO: 10  
 PROCNO: 1  
 F2 - Acquisition Parameters  
 Date\_: 2004/02/02  
 Time: 18:33  
 INSTRUM: spect  
 PROBHD: 5 mm QNP 1H/1  
 PULPROG: zgpg30  
 TO: 32768  
 SOLVENT: CDCl3  
 NS: 16  
 DS: 2  
 SWH: 2913.753 Hz  
 FIDRES: 0.089321 Hz  
 AQ: 5.6230388 sec  
 RG: 1625.5  
 DM: 171.600 usec  
 DE: 20.00 usec  
 TE: 300.0 K  
 D1: 1.00000000 sec  
 ===== CHANNEL f1 =====  
 NUC1: <sup>1</sup>H  
 P1: 17.50 usec  
 PL1: 4.00 dB  
 SF01: 250.130174 MHz  
 F2 - Processing parameters  
 SI: 32768  
 SF: 250.130174 MHz  
 MCN: EM  
 SSB: 0  
 LB: 0.30 Hz  
 GB: 0  
 PC: 0.50  
 ID NMR plot parameters  
 CX: 22.00 cm  
 CY: 12.50 cm  
 FIP: 11.000 ppm  
 F1: 2751.43 Hz  
 F2P: -0.500 ppm  
 F2: -125.06 Hz  
 PPMCH: 0.5223 ppm/cm  
 HZCM: 130.74579 Hz/cm
